# Supplementary material for: Myeloid response evaluated by noninvasive CT imaging predicts post-surgical survival and immune checkpoint therapy benefits in patients with hepatocellular carcinoma
Source: PubMed Central journal article supplement (PMC11646988; doi:10.3389/fimmu.2024.1493735), 2024-12-02
Supplement: DataSheet1.pdf [file DataSheet1.pdf]

## Supplementary Materials

### Supplementary Method S1: Radiomics feature extraction

In this study, original and filtered CT images were used for radiomics feature extraction using the open-source Pyradiomics package(1) in Python 3.7.6. According to the YAML-convention ([www.yaml.org](http://www.yaml.org)), three types of parameters for radiomics feature extraction were defined as follows:

**i) Image types:** ‘Original’, ‘Laplacian of Gaussian (LoG)’, and ‘Wavelet’. For the derived images, LoG filter was used for image filtration with sigma of 2 mm, 4 mm, and 6 mm, respectively. Wavelet filter was applied to focus features on the different decomposition and approximation level of the original contoured volumes, and the bin width of which was set as 10.

**ii) Hyperparameter setting:** ‘geometryTolerance’, ‘binWidth’, ‘interpolator’, and ‘resampledPixelSpacing’. The geometry tolerance was set as 1.00000e-4. Voxels in each volume were resampled to a unified voxel size of 1×1×1 mm<sup>3</sup> using ‘sitkBSpline’ while the bin width was set as 25.

**iii) Feature groups:** ‘shape’, ‘firstorder’, ‘glcm’, ‘gllm’, ‘glszm’, and ‘ngtdm’.

The radiomics feature group and name are listed in supplementary Table S2. The detailed descriptions and mathematical formulas can be referred to <https://pyradiomics.readthedocs.io>.

### References

1. Joost J M vG, Andriy F, Chintan P, Ahmed H, Nicole A, Vivek N, et al. Computational Radiomics System to Decode the Radiographic Phenotype. *Cancer Res.* (2017) 77. doi: 10.1158/0008-5472.Can-17-0339.

**Supplementary Table S1.** CT acquisition parameters

| CT scanner             | Spectral CT (GE Discovery CT 750HD, Healthcare) | 128-slice GE (Aquilion Toshiba) | spiral CT (TSX-101A) | 256-slice spiral CT (Brilliance 16, Philips) |
|------------------------|-------------------------------------------------|---------------------------------|----------------------|----------------------------------------------|
| Tube voltage (kV)      | 120                                             | 120                             |                      | 120                                          |
| Tube current (mA)      | 300                                             | 250/300                         |                      | 234/281/313/350/375                          |
| Matrix size            | 512×512                                         | 512×512                         |                      | 512×512                                      |
| Section thickness (mm) | 5                                               | 5                               |                      | 5                                            |
| Section interval (mm)  | 5                                               | 5                               |                      | 5                                            |
| Helical pitch (kV)     | 0.984                                           | 1.0                             |                      | 1.0                                          |

**Supplementary Table S2.** Types of the extracted radiomics features

| <b>Feature group</b>                 | <b>Number</b>                         | <b>Feature name</b>          | <b>Feature name</b>                  |                                      |                               |
|--------------------------------------|---------------------------------------|------------------------------|--------------------------------------|--------------------------------------|-------------------------------|
| Shape                                | 13                                    | Flatness                     | Mesh volume                          |                                      |                               |
|                                      |                                       | Least axis length            | Minor axis length                    |                                      |                               |
|                                      |                                       | Major axis length            | Sphericity                           |                                      |                               |
|                                      |                                       | Maximum 2D diameter (Column) | Surface area                         |                                      |                               |
|                                      |                                       | Maximum 2D diameter (Row)    | Surface area to volume ratio         |                                      |                               |
|                                      |                                       | Maximum 2D diameter (Slice)  | Voxel volume                         |                                      |                               |
|                                      |                                       | Maximum 3D Diameter          |                                      |                                      |                               |
| First-order                          | 18                                    | 10th percentile              | Median                               |                                      |                               |
|                                      |                                       | 90th percentile              | Minimum                              |                                      |                               |
|                                      |                                       | Energy                       | Range                                |                                      |                               |
|                                      |                                       | Entropy                      | Robust mean absolute deviation       |                                      |                               |
|                                      |                                       | Interquartile range          | Root mean squared                    |                                      |                               |
|                                      |                                       | Kurtosis                     | Skewness                             |                                      |                               |
|                                      |                                       | Maximum                      | Total Energy                         |                                      |                               |
|                                      |                                       | Mean absolute deviation      | Uniformity                           |                                      |                               |
|                                      |                                       | Mean                         | Variance                             |                                      |                               |
|                                      |                                       | GLCM                         | 24                                   | Auto correlation                     | Inverse difference normalized |
| Cluster prominence                   | Informational measure of correlation1 |                              |                                      |                                      |                               |
| Cluster shade                        | Informational measure of correlation2 |                              |                                      |                                      |                               |
| Cluster tendency                     | Inverse variance                      |                              |                                      |                                      |                               |
| Contrast                             | Joint average                         |                              |                                      |                                      |                               |
| Correlation                          | Joint energy                          |                              |                                      |                                      |                               |
| Difference average                   | Joint entropy                         |                              |                                      |                                      |                               |
| Difference entropy                   | Maximal correlation coefficient       |                              |                                      |                                      |                               |
| Difference variance                  | Maximum probability                   |                              |                                      |                                      |                               |
| Inverse difference                   | Sum average                           |                              |                                      |                                      |                               |
| Inverse difference moment            | Sum entropy                           |                              |                                      |                                      |                               |
| Inverse difference moment Normalized | Sum squares                           |                              |                                      |                                      |                               |
| GLRLM                                | 16                                    |                              |                                      | Gray level non-uniformity            | Run entropy                   |
|                                      |                                       |                              |                                      | Gray level non-uniformity Normalized | Run length non-uniformity     |
|                                      |                                       | Gray level variance          | Run length non-uniformity Normalized |                                      |                               |
|                                      |                                       |                              |                                      |                                      |                               |

|       |    |                                      |                                     |            |          |
|-------|----|--------------------------------------|-------------------------------------|------------|----------|
| GLSZM | 16 | High gray level run emphasis         | Run percentage                      |            |          |
|       |    | Long run emphasis                    | Run variance                        |            |          |
|       |    | Long run high gray level Emphasis    | Short run emphasis                  |            |          |
|       |    | Long run low gray level Emphasis     | Short run high gray level Emphasis  |            |          |
|       |    | Low gray level run emphasis          | Short run low gray level Emphasis   |            |          |
|       |    | Gray level non-uniformity Normalized | Size-zone non-uniformity Normalized |            |          |
|       |    | Gray level non-uniformity            | Size-zone non-uniformity            |            |          |
|       |    | Gray level variance                  | Small area emphasis                 |            |          |
|       |    | High gray level zone emphasis        | Small area high gray level Emphasis |            |          |
|       |    | Large area emphasis                  | Small area low gray level Emphasis  |            |          |
|       |    | Large area high gray level Emphasis  | Zone entropy                        |            |          |
|       |    | Large area low gray level Emphasis   | Zone percentage                     |            |          |
|       |    | Low gray level zone emphasis         | Zone variance                       |            |          |
|       |    | NGTDM                                | 5                                   | Busyness   | Contrast |
|       |    |                                      |                                     | Coarseness | Strength |
|       |    |                                      |                                     | Complexity |          |

**Abbreviations:** GLCM, gray level co-occurrence matrix; GLRLM, gray level run length matrix; GLSZM, gray level size zone matrix; NGTDM, neighboring gray tone difference matrix.

**Supplementary Table S3.** Number of stable radiomics features under different intra- and inter-rater ICC thresholds.

| ICC    | NP          |             | AP          |             | PVP         |             |
|--------|-------------|-------------|-------------|-------------|-------------|-------------|
|        | Intra-rater | Inter-rater | Intra-rater | Inter-rater | Intra-rater | Inter-rater |
| ≥ 0.75 | 755         | 586         | 739         | 609         | 763         | 631         |
| ≥ 0.80 | 725         | 555         | 718         | 575         | 741         | 609         |
| ≥ 0.85 | 688         | 482         | 683         | 536         | 711         | 571         |
| ≥ 0.90 | 638         | 452         | 648         | 499         | 665         | 515         |

**Abbreviations:** ICC, intraclass correlation coefficient; NP, noncontrast phase; AP, arterial phase; PVP, portal venous phase.

**Supplementary Table S4.** Radiomics features included in the optimal radiomics signatures identified from triple phase CT images

| Phase | Radiomics features                                 |
|-------|----------------------------------------------------|
| NP    | wavelet-LLH_glszm_ZonePercentage                   |
|       | log-sigma-2-0-mm-3D_ngtdm_Strength                 |
| AP    | log-sigma-2-0-mm-3D_firstorder_Variance            |
|       | log-sigma-2-0-mm-3D_glcmm_Autocorrelation          |
|       | log-sigma-4-0-mm-3D_ngtdm_Strength                 |
|       | log-sigma-6-0-mm-3D_glszm_GrayLevelNonUniformity   |
|       | wavelet-LLH_glszm_SmallAreaHighGrayLevelEmphasis   |
|       | wavelet-LHL_glszm_SmallAreaEmphasis                |
|       | wavelet-HLH_glcmm_DifferenceEntropy                |
|       | wavelet-HHL_glszm_GrayLevelNonUniformityNormalized |
| PVP   | wavelet-HHH_glszm_SmallAreaHighGrayLevelEmphasis   |
|       | log-sigma-4-0-mm-3D_firstorder_Kurtosis            |
|       | wavelet-LHH_glszm_GrayLevelNonUniformityNormalized |
|       | wavelet-HHH_glszm_HighGrayLevelZoneEmphasis        |
|       | wavelet-LHL_firstorder_Median                      |
|       | wavelet-LLH_glszm_HighGrayLevelZoneEmphasis        |
| PVP   | log-sigma-6-0-mm-3D_ngtdm_Busyness                 |
|       | log-sigma-6-0-mm-3D_firstorder_Kurtosis            |
|       | wavelet-HHH_glszm_GrayLevelNonUniformityNormalized |
|       | wavelet-LHH_glrmm_GrayLevelNonUniformityNormalized |
|       | wavelet-LHL_glszm_SmallAreaLowGrayLevelEmphasis    |

**Abbreviations:** NP, non-enhanced phase; AP, arterial phase; PVP, portal venous phase.

**Supplementary Table S5.** Multivariate COX proportional hazards analysis of clinicopathological associated with recurrence

| Characteristics   | Multivariate COX     |         |
|-------------------|----------------------|---------|
|                   | HR (95% CI)          | P value |
| Child-Pugh class  | 8.573 (1.647-44.622) | 0.011*  |
| Tumor number      | 2.796 (1.613-4.844)  | <0.001* |
| Vascular invasion | 4.232 (2.078-8.617)  | <0.001* |

**Abbreviations:** HR, hazard ratio; CI, confidence interval.

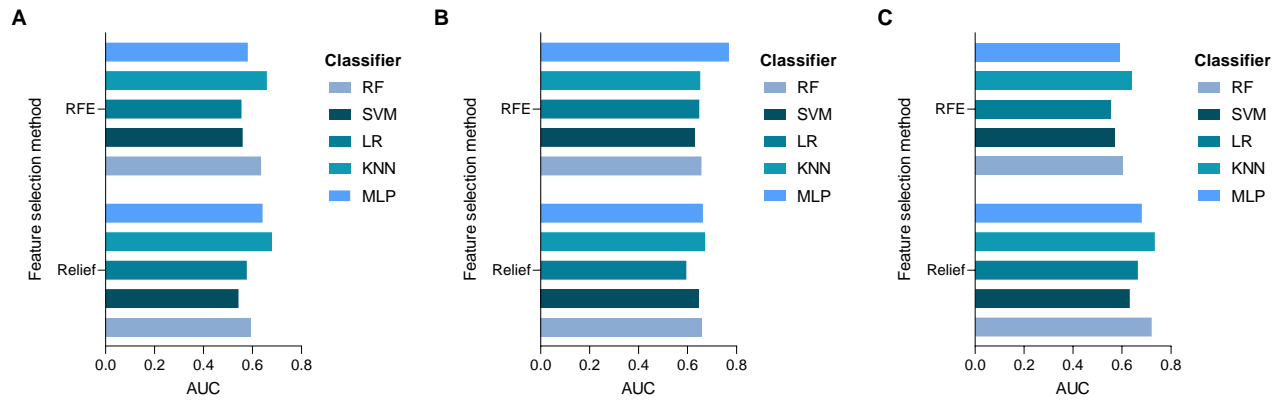

**Supplementary Figure S1.** Performance comparisons of different feature selection algorithms and classifiers in the test cohort. **(A)** NP; **(B)** AP; **(C)** PVP. **Abbreviations:** NP, noncontrast phase; AP, arterial phase; PVP, portal venous phase; RF, random forest; SVM, support vector machine; LR, logistic regression; KNN, K-nearest neighbor; MLP, multilayer perceptron; RFE, recursive feature elimination.
